# Supplementary material
Source: HighWire-hosted journal article supplement (https://bmjopenrespres.bmj.com/content/suppl/2023/01/18/10.1.e001426)
Supplement: bmjresp-2022-001426supp003_data_supplement.pdf [file bmjresp-2022-001426supp003_data_supplement.pdf]

## SUPPLEMENTAL 3

| <b>Cohort</b>                     | <b>EQ-5D<br/>increment 1<br/>(no. of patients)</b> | <b>EQ-5D<br/>increment 2<br/>(no. of patients)</b> | <b>EQ-5D<br/>increment 3<br/>(no. of patients)</b> | <b>EQ-5D<br/>increment 4<br/>(no. of patients)</b> | <b>EQ-5D<br/>increment 5<br/>(no. of patients)</b> |
|-----------------------------------|----------------------------------------------------|----------------------------------------------------|----------------------------------------------------|----------------------------------------------------|----------------------------------------------------|
| <b>Intervention<br/>Baseline</b>  | 26                                                 | 52                                                 | 51                                                 | 31                                                 | 12                                                 |
| <b>Intervention<br/>3 Months</b>  | 23                                                 | 45                                                 | 37                                                 | 23                                                 | 5                                                  |
| <b>Intervention<br/>12 Months</b> | 29                                                 | 27                                                 | 45                                                 | 15                                                 | 4                                                  |
| <b>Usual Care<br/>12 Months</b>   | 31                                                 | 25                                                 | 29                                                 | 16                                                 | 7                                                  |

The number of patients reporting their pain score at each increment of the pain and discomfort question of the EQ-5D
